# Supplementary material for: Investigation of Structures, Stabilities, and Electronic and Magnetic Properties of Niobium Carbon Clusters Nb7Cn (n = 1–7)
Source: MDPI journal article supplement (doi:10.3390/molecules29081692), 2024-04-09
Supplement: s1 [file s1]

# Supplementary Materials

## Investigation of Structures, Stabilities, and Electronic and Magnetic Properties of Niobium Carbon Clusters Nb<sub>7</sub>C<sub>n</sub> (n = 1–7)

Hui-Fang Li <sup>1</sup>, Huai-Qian Wang <sup>1,2,\*</sup>, Jia-Ming Zhang <sup>2</sup>, Lan-Xin Qin <sup>1</sup>, Hao Zheng <sup>2</sup> and Yong-Hang Zhang <sup>2</sup>

<sup>1</sup> College of Engineering, Huaqiao University, Quanzhou 362021, China

<sup>2</sup> College of Information Science and Engineering, Huaqiao University, Xiamen 361021, China

\* Correspondence: hqwang@hqu.edu.cn

### Table of Contents

**Table S1.** Cartesian coordinates for the lowest energy structure of Nb<sub>7</sub>C<sub>n</sub> (n =1-7) at the B3LYP/Nb/SDD//C/6-311+G(2d) level.

**Figure S1.** The IR spectra of the lowest-energy structures of Nb<sub>7</sub>C<sub>n</sub> (n=1-7) clusters.

**Table S1.** Cartesian coordinates for the lowest energy structure of Nb<sub>7</sub>C<sub>n</sub> (n =1-7) at the B3LYP/Nb/SDD//C/6-311+G(2d) level.

Nb<sub>7</sub>C

| Atom | X         | Y         | Z         |
|------|-----------|-----------|-----------|
| Nb   | 1.768834  | -0.519511 | 0.000000  |
| Nb   | -0.254648 | -1.566425 | 1.347622  |
| Nb   | -2.199216 | -0.592950 | 0.000000  |
| Nb   | -0.254648 | -1.566425 | -1.347622 |
| Nb   | -0.254648 | 1.094167  | 1.467610  |
| Nb   | 1.692680  | 1.866832  | 0.000000  |
| Nb   | -0.254648 | 1.094167  | -1.467610 |
| C    | -1.665345 | 1.299325  | 0.000000  |

Nb<sub>7</sub>C<sub>2</sub>

| Atom | X         | Y         | Z         |
|------|-----------|-----------|-----------|
| Nb   | 1.077880  | 1.419154  | 0.735389  |
| Nb   | -1.077459 | 1.430304  | -0.715138 |
| Nb   | -2.341355 | -0.785714 | -0.535413 |
| Nb   | 1.302786  | 0.289362  | -1.661125 |
| Nb   | -0.000181 | -1.681397 | -0.013960 |
| Nb   | -1.302429 | 0.263758  | 1.665734  |
| Nb   | 2.340796  | -0.794484 | 0.525657  |
| C    | -0.583169 | -0.468397 | -1.681930 |
| C    | 0.582914  | -0.494987 | 1.674106  |

Nb<sub>7</sub>C<sub>3</sub>

| Atom | X         | Y         | Z         |
|------|-----------|-----------|-----------|
| Nb   | -0.536203 | -0.232820 | -1.801387 |
| Nb   | 1.183527  | 1.549572  | -0.715415 |
| Nb   | -1.136462 | 1.674189  | 0.269735  |
| Nb   | -2.425165 | -0.414021 | 0.048646  |
| Nb   | -0.298637 | -1.887401 | 0.675911  |
| Nb   | 0.924015  | 0.550235  | 1.822212  |
| Nb   | 2.119147  | -0.799107 | -0.548089 |
| C    | 0.549417  | -1.813515 | -1.233086 |
| C    | 1.615534  | -1.223451 | 1.342875  |
| C    | -1.004803 | 0.025874  | 1.587516  |

$\text{Nb}_7\text{C}_4$

| Atom | X        | Y        | Z        |
|------|----------|----------|----------|
| Nb   | 1.057318 | -0.26099 | 1.736534 |
| Nb   | -1.55844 | 1.583457 | 0.597334 |
| Nb   | 1.26285  | 1.714998 | -0.41153 |
| Nb   | 2.533946 | -0.42147 | -0.2882  |
| Nb   | 0.187106 | -1.94918 | -0.65554 |
| Nb   | -1.13171 | 0.48085  | -1.68288 |
| Nb   | -2.2018  | -0.92498 | 0.706031 |
| C    | -0.40813 | -1.6255  | 1.264964 |
| C    | -1.75707 | -1.38392 | -1.16805 |
| C    | 0.810577 | -0.11018 | -1.46423 |
| C    | 0.334662 | 1.597935 | 1.355294 |

$\text{Nb}_7\text{C}_5$

| Atom | X        | Y        | Z        |
|------|----------|----------|----------|
| Nb   | -0.70951 | -0.05709 | -1.68426 |
| Nb   | 2.016795 | 0.958266 | -0.79061 |
| Nb   | -0.55522 | 2.16208  | 0.353432 |
| Nb   | -2.4324  | 0.297022 | 0.127084 |
| Nb   | -0.75958 | -1.58325 | 1.087583 |
| Nb   | 1.383634 | 0.336634 | 1.621099 |
| Nb   | 1.322892 | -1.6271  | -0.6642  |
| C    | -0.75394 | -2.23107 | -1.05442 |
| C    | 1.292109 | -1.65517 | 1.343759 |
| C    | -0.71458 | 0.477281 | 1.517641 |
| C    | 0.30518  | 1.740497 | -1.38962 |
| C    | -1.95066 | -1.65645 | -0.75995 |

$\text{Nb}_7\text{C}_6$

| Atom | X        | Y        | Z        |
|------|----------|----------|----------|
| Nb   | 0.574181 | -1.11489 | -1.39113 |
| Nb   | -2.14377 | -1.29241 | -0.0392  |
| Nb   | 0.577441 | -1.20807 | 1.32156  |
| Nb   | 2.751336 | -0.21979 | -0.00705 |
| Nb   | 0.758786 | 1.767129 | 0.053577 |
| Nb   | -1.48325 | 0.771245 | 1.510955 |
| Nb   | -1.48195 | 0.860723 | -1.46124 |
| C    | 0.576189 | 1.01244  | -2.02909 |
| C    | -1.3268  | 2.11169  | 0.064834 |

|   |          |          |          |
|---|----------|----------|----------|
| C | 1.843188 | 0.591181 | 1.65812  |
| C | -0.45505 | -2.31203 | -0.07194 |
| C | 1.844828 | 0.695168 | -1.61967 |
| C | 0.573647 | 0.881293 | 2.083335 |

Nb<sub>7</sub>C<sub>7</sub>

| Atom | X        | Y        | Z        |
|------|----------|----------|----------|
| Nb   | 0.715775 | -1.53497 | 0.962424 |
| Nb   | -1.56396 | -2.01567 | -0.6617  |
| Nb   | 0.116678 | 0.136086 | -1.42218 |
| C    | 0.613626 | 0.342967 | 2.065242 |
| C    | 1.885473 | 0.27982  | 1.535186 |
| C    | 0.42756  | -2.14272 | -1.21044 |
| Nb   | -1.37347 | 0.111295 | 1.395129 |
| Nb   | 2.754614 | -0.0629  | -0.32496 |
| C    | 1.682281 | -1.63881 | -1.0944  |
| Nb   | -1.82746 | 1.936903 | -0.51685 |
| Nb   | 0.729494 | 1.976523 | 0.487257 |
| C    | -2.02544 | -0.01674 | -0.83975 |
| C    | 1.830165 | 1.433963 | -1.16059 |
| C    | -1.35004 | -1.99813 | 1.257453 |

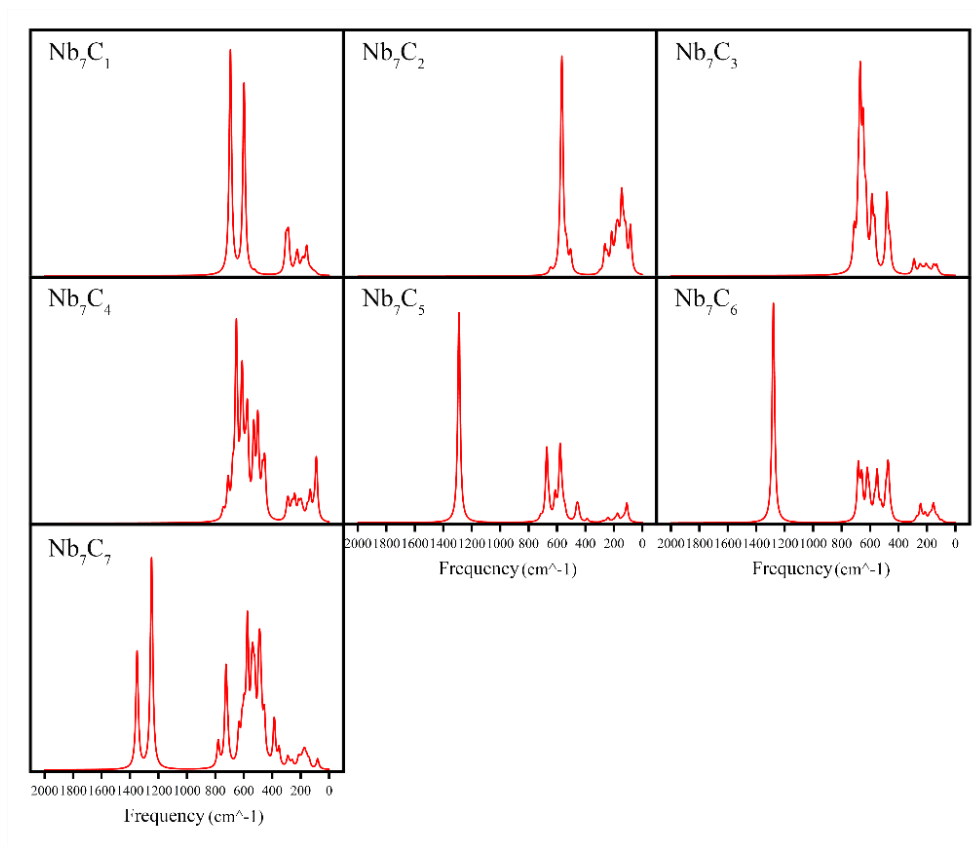

**Figure S1.** The IR spectra of the lowest-energy structures of Nb<sub>7</sub>C<sub>n</sub> (n=1-7) clusters.
